# Supplementary material
Source: HighWire-hosted journal article supplement (https://jnm.snmjournals.org/highwire/filestream/95319/field_highwire_adjunct_files/0/206331_Supplemental_Data.pdf)
Supplement: 206331_Supplemental_Data.pdf [file 206331_Supplemental_Data.pdf]

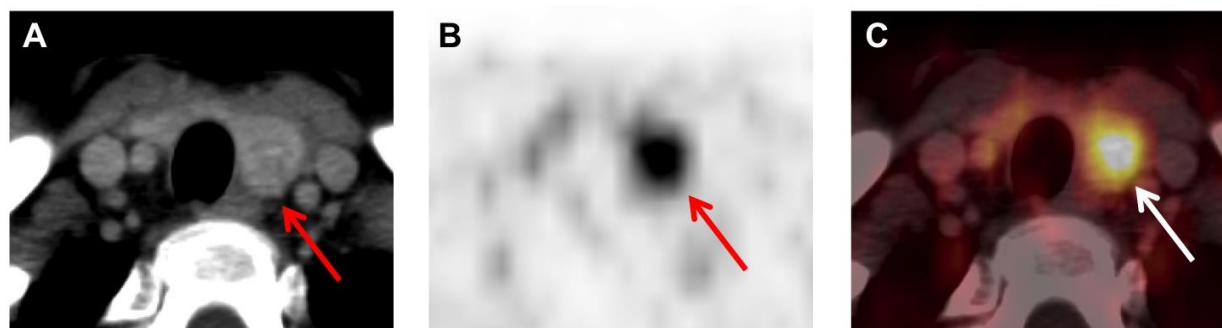

**Supplemental Figure 1. SSTR-RADS-1B.**

Axial 68Ga-DOTATOC PET (A), axial CT (B) and axial 68Ga-DOTATOC PET/CT (C) showing intense focus of uptake in the thyroid (arrow). Patient had a history of thyroid adenoma.

#### SUPPLEMENTAL TABLE

|                          |                                                                                                                                                                                                                                                                                                                                                                                                                                                                             |
|--------------------------|-----------------------------------------------------------------------------------------------------------------------------------------------------------------------------------------------------------------------------------------------------------------------------------------------------------------------------------------------------------------------------------------------------------------------------------------------------------------------------|
| <b>Patient's History</b> | <ul style="list-style-type: none"> <li>✓ Primary tumor origin</li> <li>✓ Date of tumor biopsy and Ki-67/ Grading</li> <li>✓ Date of primary diagnosis</li> <li>✓ Presence of any symptoms</li> <li>✓ Previous therapies (incl. SSA and PRRT)</li> <li>✓ Previous conventional and/or functional imaging including SSTR- and 18F-FDG PET scans</li> <li>✓ History and treatment of other malignancies</li> <li>✓ Laboratory test results (NSE, CgA), if available</li> </ul> |
| <b>Imaging Data</b>      | <ul style="list-style-type: none"> <li>✓ Injected amount/ activity</li> <li>✓ Uptake time</li> <li>✓ Field of view</li> </ul>                                                                                                                                                                                                                                                                                                                                               |

**Supplemental Table 1.** Minimum required data in a clinical report. SSA = somatostatin analogues, PRRT = Peptide Receptor Radionuclide Therapy, 18F-FDG = 2-deoxy-2-(18F)fluoro-D-glucose, NSE = neuron-specific enolase, CgA = Chromogranin A.
